1 **Retinal horizontal cells use different synaptic sites for global**  
2 **feedforward and local feedback signaling**

3

4 Christian Behrens<sup>1-4</sup>, Yue Zhang<sup>1,2,4</sup>, Shubhash Chandra Yadav<sup>5</sup>, Silke Haverkamp<sup>6</sup>, Stephan  
5 Irsen<sup>7</sup>, Maria M. Korympidou<sup>1,2,4</sup>, Anna Schaedler<sup>1,2,4</sup>, Karin Dedek<sup>5</sup>, Robert G. Smith<sup>8</sup>,  
6 Thomas Euler<sup>1-3</sup>, Philipp Berens<sup>1-3,9</sup>, Timm Schubert<sup>1,2</sup>

7

8 <sup>1</sup>*Institute for Ophthalmic Research, University of Tübingen, 72076 Tübingen, Germany*

9 <sup>2</sup>*Center for Integrative Neuroscience, University of Tübingen, 72076 Tübingen, Germany*

10 <sup>3</sup>*Bernstein Center for Computational Neuroscience, University of Tübingen, 72076 Tübingen, Germany*

11 <sup>4</sup>*Graduate Training Centre of Neuroscience, University of Tübingen, 72076 Tübingen, Germany*

12 <sup>5</sup>*Neurosensorics/Animal Navigation, Institute for Biology and Environmental Sciences, University of Oldenburg,*  
13 *26111 Oldenburg, Germany*

14 <sup>6</sup>*Department of Computational Neuroethology, Center of Advanced European Studies and Research (caesar),*  
15 *53175 Bonn, Germany*

16 <sup>7</sup>*Department of Electron Microscopy and Analytics, Center of Advanced European Studies and Research*  
17 *(caesar), 53175 Bonn, Germany*

18 <sup>8</sup>*Department of Neuroscience, University of Pennsylvania, Philadelphia, PA 19104, USA*

19 <sup>9</sup>*Institute for Bioinformatics and Medical Informatics, University of Tübingen, 72076 Tübingen, Germany*

20 **Abstract**

21 In the outer plexiform layer (OPL) of the mouse retina, two types of cone photoreceptors (cones)  
22 provide input to more than a dozen types of cone bipolar cells (CBCs). This transmission is modulated  
23 by a single horizontal cell (HC) type, the only interneuron in the outer retina. Horizontal cells form  
24 feedback synapses with cones and feedforward synapses with CBCs. However, the exact  
25 computational role of HCs is still debated. Along with performing global signaling within their  
26 laterally coupled network, HCs also provide local, cone-specific feedback. Specifically, it has not been  
27 clear which synaptic structures HCs use to provide local feedback to cones and global forward  
28 signaling to CBCs.

29 Here, we reconstructed in a serial block-face electron microscopy volume the dendritic trees of  
30 five HCs as well as cone axon terminals and CBC dendrites to quantitatively analyze their  
31 connectivity. In addition to the fine HC dendritic tips invaginating cone axon terminals, we also  
32 identified “bulbs”, short segments of increased dendritic diameter on the primary dendrites of HCs.  
33 These bulbs are located well below the cone axon terminal base and make contact to other cells mostly  
34 identified as other HCs or CBCs. Using immunolabeling we show that HC bulbs express vesicular  
35 gamma-aminobutyric acid transporters and co-localize with GABA receptor  $\gamma 2$  subunits. Together,  
36 this suggests the existence of two synaptic strata in the mouse OPL, spatially separating cone-specific  
37 feedback and feedforward signaling to CBCs. A biophysics-based computational model of a HC  
38 dendritic branch supports the hypothesis that the spatial arrangement of synaptic contacts allows  
39 simultaneous local feedback and global feedforward signaling.

## 40 **Introduction**

41 At the very first synapse of the mouse visual system, the signal from the cone photoreceptors (cones)  
42 is relayed to second-order neurons: each cone axon terminal has more than 10 output sites, contacting  
43 a sample of the 13 types of cone bipolar cells (CBCs) (Wässle et al. 2009; Tsukamoto and Omi 2014;  
44 Behrens et al. 2016), which relay the signal ‘vertically’ to retinal output neurons, the retinal ganglion  
45 cells. In a complementary circuit, laterally-organized horizontal cells (HCs) modulate the  
46 photoreceptor-BC synapse (Haverkamp, Grünert, and Wässle 2000). Each ON-cone bipolar cell (ON-  
47 CBC) dendrite invaginates the cone axon terminal to contact an individual cone output site and forms  
48 a triad with HC dendritic processes, whose distal dendritic tips also invaginate the synaptic cleft,  
49 flanking ON-CBC dendrites. In contrast, OFF-CBC dendrites contact the cone axon terminal base  
50 without forming contacts with HC dendritic tips (reviewed in Diamond 2017) (Fig. 1a).

51 Horizontal cells are thought to play a major role in global visual processing and to contribute  
52 to contrast enhancement and generation of center-surround receptive fields, providing global feedback  
53 signals to cones and feedforward signals to BCs (reviewed in Thoreson and Mangel 2012;  
54 Drinnenberg et al. 2018; Ströh et al. 2018). Functional measurements indicate that HCs provide local  
55 feedback to photoreceptors (Jackman et al. 2011; Chapot et al. 2017), modulating each cone’s output  
56 individually. However, the role of this local feedback is unclear in the context of the HC’s traditional  
57 role of providing global feedback.

58 In addition, synapses between HCs and BCs were observed in in electron microscopic studies  
59 over three decades ago but have not been further investigated (Olney 1968; Kolb 1977; Linberg and  
60 Fisher 1988). Thus, despite our increasing knowledge of the complex interplay of different synaptic  
61 mechanisms underlying HC feedback to cones (Liu et al. 2013; Kemmler et al. 2014; Vroman et al.  
62 2014; Grove et al. 2019), a quantitative anatomical picture of the outer retinal connectivity with the  
63 HC as a central player is missing.

64 Here, we made use of the serial block face electron microscopy dataset e2006 (Helmstaedter et al.  
65 2013) to reconstruct the outer mouse retina with a focus on the HC circuitry and identify the  
66 connectivity motifs made between HCs and other neuron types. In addition to the invaginating  
67 contacts between cones and HCs in the cone axon terminal, we identified and quantitatively assessed –  
68 at the level of primary HC dendrites – putative GABAergic synapses among HCs as well as between  
69 HCs and CBCs as previously hypothesized (Dowling, Brown, and Major 1966; Marchiafava 1978;  
70 Yang and Wu 1991; Duebel et al. 2006). Based on a biophysical model of HC signaling, we propose  
71 that a role of this putative second synaptic site in HCs is to provide global signals in the form of  
72 GABAergic input to postsynaptic CBCs, complementing the local feedback provided directly to cones.  
73 This suggests that a single interneuron can simultaneously provide local reciprocal feedback and  
74 global feedforward signals at distinct synaptic locations.

## 75 **Results**

### 76 **Reconstruction of horizontal cells and connectivity with cone photoreceptors**

77 Using the publicly available serial block-face electron microscopy dataset e2006 (Helmstaedter et al.,  
78 2013, Fig. 1b), we reconstructed five complete dendritic arbors of HCs in the outer mouse retina (Fig.  
79 1c,d). We analyzed the contacts of all three classes of neurons in the outer retina – cones, BCs and  
80 HCs (Helmstaedter et al. 2013; Behrens et al. 2016) – to gain a complete picture of outer retinal  
81 connectivity. The reconstructed HCs had a dendritic area of  $4,600 \pm 400 \mu\text{m}^2$  (mean  $\pm$  SD) with 4 to 6  
82 primary dendrites leaving the soma ( $n = 5$  HCs) and extended fine dendritic tips towards cone axon  
83 terminals (Fig. 1e). Next, we analyzed the HC connectivity within the cone axon terminals (Fig. 2a).  
84 Each HC contacted on average  $61 \pm 5$  (between 51 and 77) cones; these were all cones within its  
85 dendritic field. Interestingly, we found that cones closer to the HC somata were contacted with  
86 significantly more fine HC tips than distal ones (Fig. 2b,c; Generalized Additive Model with smooth  
87 term for distance from soma and random effect of specific HC,  $p < 2 \cdot 10^{-16}$  for smooth term, see  
88 Methods for details). In addition, the contact area – the area of close apposition between cell  
89 membranes, a proxy for the probability of synaptic contacts (Helmstaedter et al. 2013) – between an  
90 individual HC and cones followed the number of invaginating contact sites along the HC dendrite and  
91 significantly decreased towards the HC's periphery (Fig. 2d; Generalized Additive Model with smooth  
92 term for distance from soma and random effect of specific HC,  $p = 4.2 \cdot 10^{-7}$  for smooth term).  
93 Together this suggests that HCs get most input from cones close to their soma.

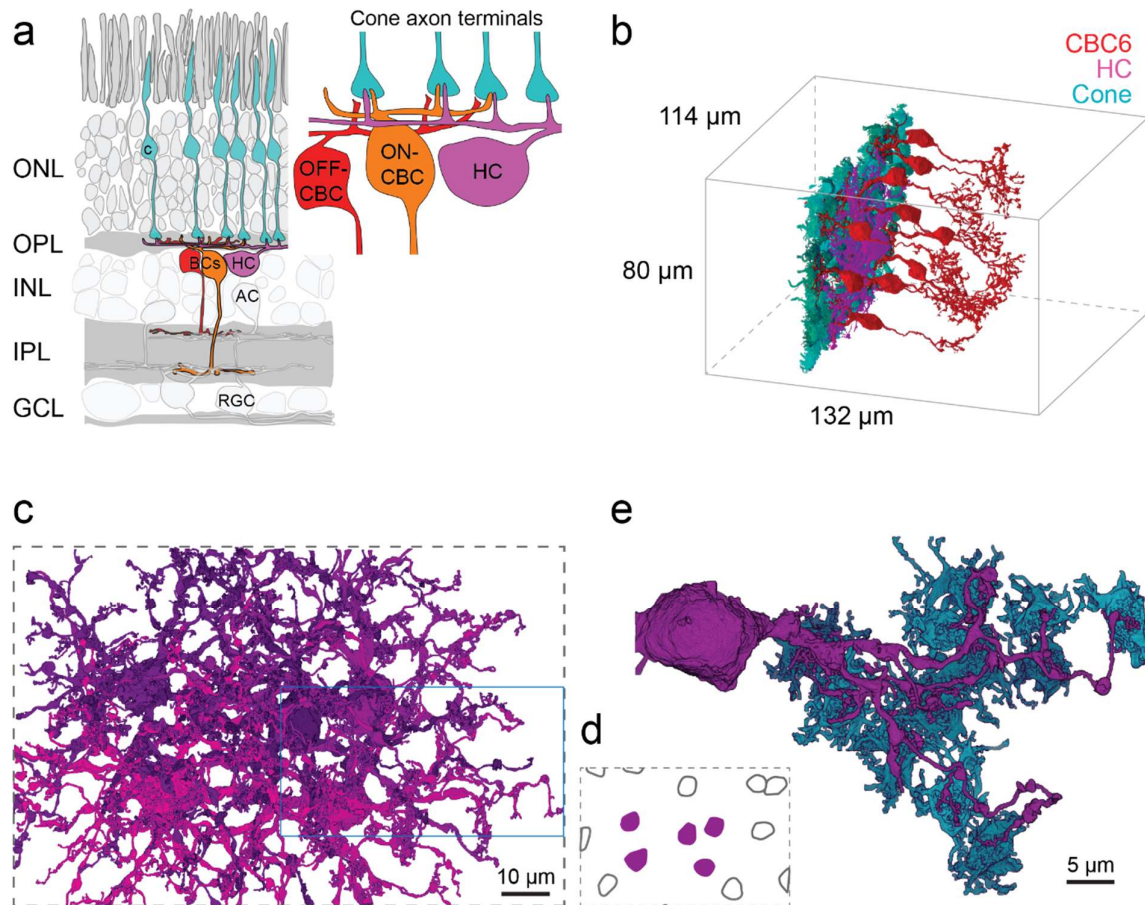

94  
95

96 **Figure 1. Horizontal cell reconstruction.** (a) Schematic of a vertical section through the mouse  
97 retina, highlighting the reconstructed cell types. Inset: Textbook-view of the connectivity of bipolar  
98 cells (BCs) and horizontal cell (HCs) at the cone axon terminals with invaginating HC (magenta) and  
99 ON-CBC (orange) dendritic tips and basal OFF-CBC contacts (red). AC, amacrine cell; RGC, retinal  
100 ganglion cell. (b) Outlines of the dataset with volume reconstructed cone axon terminals (cyan), one  
101 HC (magenta) and several CBC6 (red, 10 of 45 CBC6s shown). (c) Volume reconstructions of five  
102 HCs (top view); blue rectangle: location of dendrite shown in (e). (d) Soma locations of the five  
103 reconstructed HCs (magenta) and 10 HCs not reconstructed (black outline) HCs. (e) Bottom view of  
104 the volume reconstruction of a complete HC dendrite (magenta) with contacted cone axon terminals  
105 (cyan). HC dendrite taken from inset in (c).

106  
107

### 108 **Invaginating contacts between cones, ON-cone bipolar cells and horizontal cells**

109 We found that the connectivity between cones and their postsynaptic partners was the typical "triad  
110 synapse" motif, where HC tips in the synaptic cleft are closely associated with invaginating dendrites  
111 of ON-CBCs. A previous study found that some ON-CBC types such as CBC types 5T, 5O, 8 and X  
112 sampled sparsely from cones (Fig. 2e; see also Fig. 3 in Behrens et al. 2016). In addition, the CBCX  
113 made rather small basal but not 'typical' invaginating contacts at the cone axon terminal, more  
114 resembling OFF-CBC contacts. If these BC types contacted cones more sparsely, the number of  
115 contacts with invaginating HC dendrites should be lower as well. We checked all ON-CBC contacts

116 (n = 36) at five central cones (making contacts with all 5 reconstructed HCs) and identified one or two  
 117 invaginating HC dendritic tips per ON-CBC tip for all contacts. This typical "triad" motif implies that  
 118 the number of contacts between HCs and ON-CBCs matches the number of cone contacts per CBC.  
 119 Thus, the number of contacts between HCs and BC types CBC5T, 5O, 8 and X within the cone axon  
 120 terminal is lower than for the other ON-CBC types (Fig. 2f).  
 121

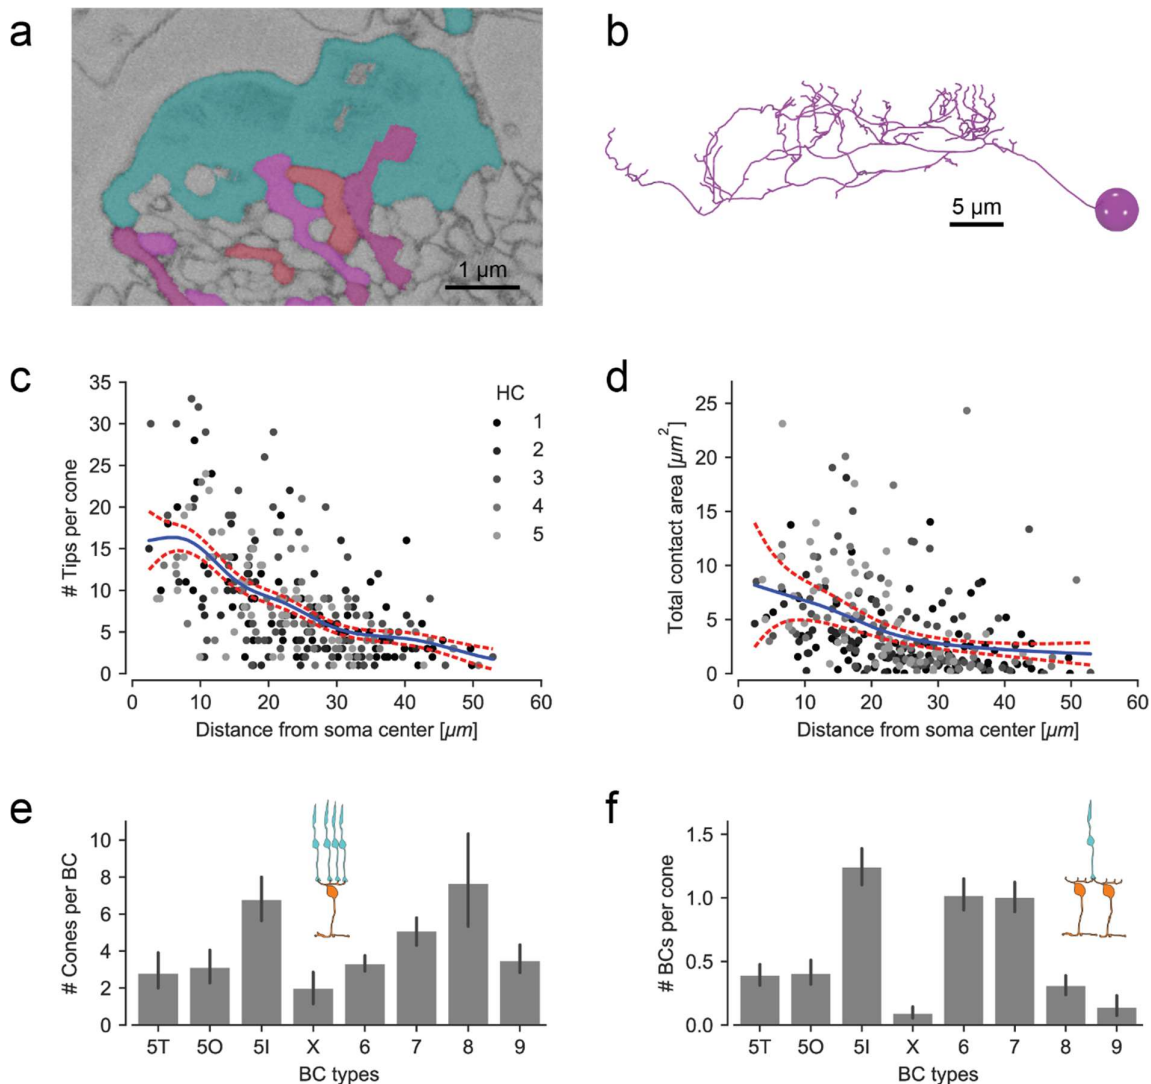

122  
 123

124 **Figure 2. Horizontal cell-to-cone and HC-to-ON-CBC contacts** (a) EM slice showing a cone axon  
 125 terminal (cyan) with invaginating contacts from an ON-CBC (red) and a HC (magenta). (b) Vertical  
 126 view of the skeleton model of the HC branch from Fig. 1e illustrating the increase of the number of  
 127 dendritic tips towards the soma. (c) HC skeleton tips per contacted cone vs. distance from HC soma.  
 128 Blue: Poisson GAM fit with 95%-confidence interval (red). (d) Contact area between HC and cone  
 129 axon terminal volume reconstructions per cone vs. distance from HC soma. Blue: Gamma GAM fit  
 130 with 95%-confidence interval (red). (e) Contacted cones per BC for all CBC types. (f) BCs contacted  
 131 per cone for all CBC types. Number of ON-BCs contacting each cone per type. Both (e) and (f)  
 132 redrawn using data from Behrens et al. 2016. Error bars show 95% CI.



### 133 **Non-invaginating (bulb) contacts between horizontal cells and bipolar cells**

134 Horizontal cell feedback modulates the cones' glutamate release directly within the invaginating cleft  
135 (Kamermans et al. 2001). For a spatially uniform stimulus pattern, this feedback should be spatially  
136 correlated and should affect the output of all cones similarly. However, for a spatially uncorrelated  
137 stimulus pattern, HC distal tips would receive uncorrelated input and provide uncorrelated feedback to  
138 neighboring cones. Indeed, HC dendritic tips have been shown to feature highly localized signals  
139 (Jackman et al. 2011; Chapot et al. 2017), making it possible to relay highly localized feedback to  
140 individual cones. Yet, in addition to transmitting local uncorrelated signals, for spatially uniform  
141 stimuli, this pathway may be also responsible for global signals traditionally suggested as a general  
142 role of HCs (Thoreson and Mangel 2012; Drinnenberg et al. 2018). The reason is that, while the local  
143 feedback from a HC distal tip to its presynaptic cone will attenuate the local signal received by the HC  
144 distal tip, the global signal transmitted from HC dendrites and soma is not attenuated.

145 However, a second synaptic output pathway where HCs could provide direct GABAergic  
146 output to BC dendrites independent from the invaginating cleft has been postulated (Marchiafava  
147 1978; Yang and Wu 1991; Duebel et al. 2006). Because dendrites of OFF-CBCs have a low and  
148 dendrites of ON-CBCs have a high chloride level (Duebel et al. 2006), GABA released by HCs that  
149 binds to GABA-gated chloride membrane channels in CBC dendrites will hyperpolarize an OFF-CBC  
150 and depolarize an ON-CBC. Therefore, an antagonistic surround in both ON- and OFF-CBCs can be  
151 generated by HCs through this lateral feedforward pathway. This feedforward signaling pathway could  
152 integrate both correlated and/or uncorrelated HCs signals along the HC primary dendrites generating a  
153 global output signal which is then relayed to BCs. However, such a synaptic HC-BC connection has  
154 not been identified so far.

155 In search of this synaptic site between HCs and CBCs, we systematically examined the five  
156 volume-rendered HCs and found regularly distributed, dendritic swellings along the primary dendrites  
157 (Fig. 3a,b). These dendritic swellings (bulbs) showed a marked increase in dendritic diameter (Fig.  
158 3c). Almost all bulbs were located clearly below the cone axon terminal base and not in direct contact  
159 with it (Fig. 3b,d). In contrast to invaginating dendritic tips that showed a higher density towards the  
160 soma of the HC, the bulbs were more regularly distributed along the primary dendrites (Fig. 3e).

161 Most of the identified bulbs contacted either bulbs of other volume-rendered HCs (67 out of  
162 545, Fig. 4a,c) or dendrites of ON- and OFF-CBCs (219 out of 545; Fig. 4b,d) or both (69), suggesting  
163 that the bulb structures represent potential HC-HC and/or HC-BC synapses. For the remaining 190  
164 bulbs, we had no information about the identity of the contacted cells. As only five HCs were traced,  
165 these contacts may well represent contacts to other HCs and/or BCs that were not traced because their  
166 soma was located outside the EM stack.

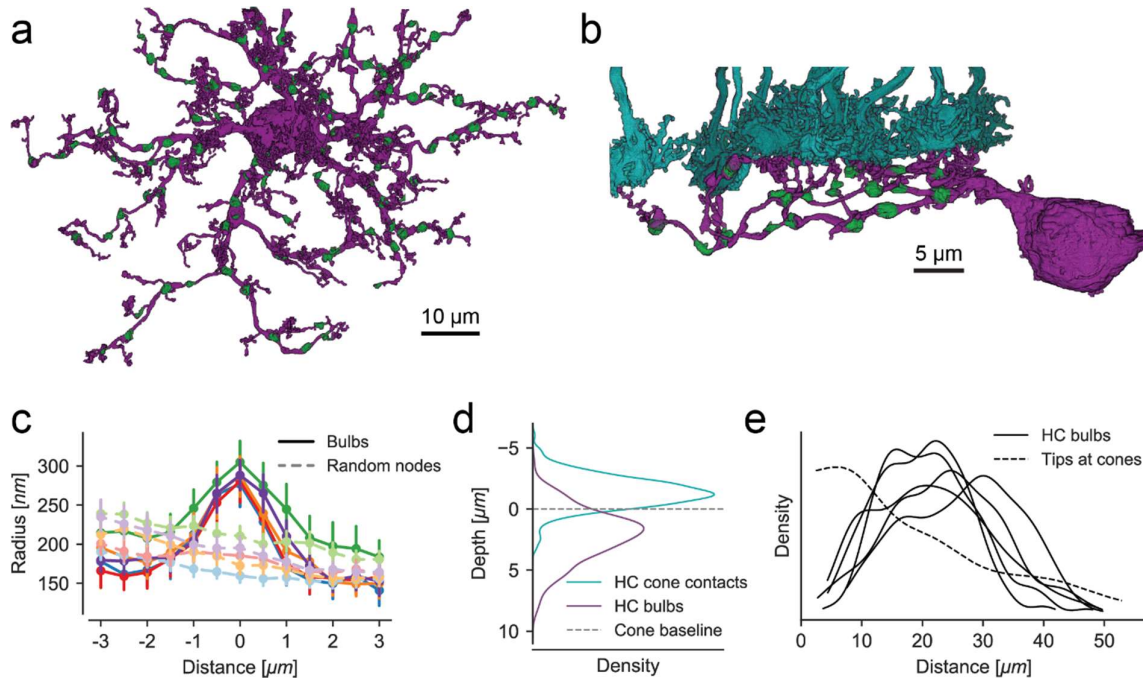

167

168

169 **Figure 3. Identification of bulbs in horizontal cells.** (a) Top view of a reconstructed HC with bulbs  
170 highlighted in green. (b) Side view of a branch from the same HC with bulbs (green) and cone axon  
171 terminals (cyan). (c) Dendritic radius profile at bulb locations (solid curves w/high saturation)  
172 compared to randomized points on the dendrites (dashed curves w/low saturation) with matching  
173 distribution of distances from soma and tips. (d) Depth of bulbs compared to HC-to-cone contacts. (e)  
174 Kernel density estimate of the distance distribution of bulbs relative to the soma for all five HCs.  
175 Dashed line: Model fit showing distribution of HC skeleton tips at cones from Fig. 2c.



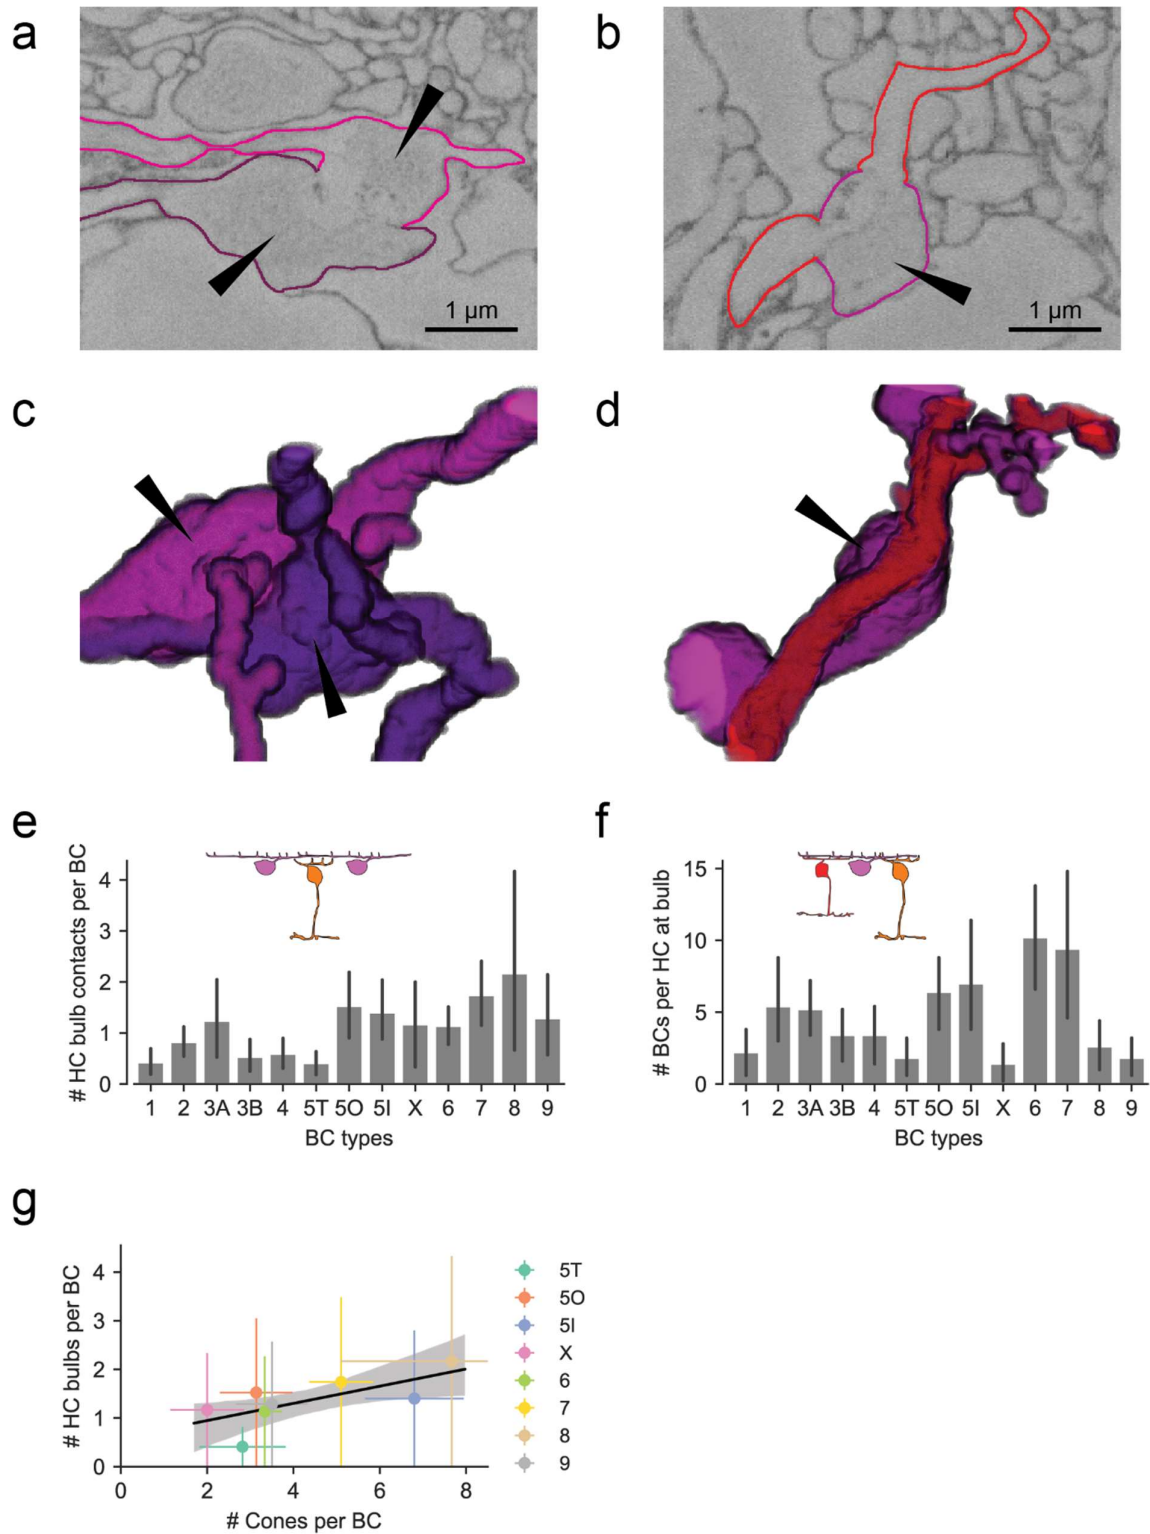

176

177 **Figure 4. Horizontal cell bulb contacts with other neurons.** (a) EM slice showing bulb contact  
 178 between two HCs. (b) Bulb contact between HC (magenta) and ON-CBC (red). (c) Volume-rendered  
 179 contact site between bulbs from two HCs. (d) Volume-rendered contact site between HC (magenta)  
 180 bulb (arrowhead) and ON-CBC dendrite (red). (e) HC bulb contacts per BC for all CBC types. (f) BCs  
 181 contacted by bulbs per HC for all CBC types. (g) Bulb contacts vs. contacted cones for all ON-CBC  
 182 types (data from (e) and Fig. 2e) with linear regression. All error bars show 95% CIs.

183 Interestingly, we found a difference in bulb-level connectivity between HCs and OFF-CBCs  
184 vs. HCs and ON-CBCs: the majority of ON-CBCs contacted HCs at the bulb site (except for CBC5T);  
185 all OFF-CBC types made considerably fewer contacts than ON-CBCs (except CBC3A) (Fig. 4e).  
186 However, the overall number of contacts per CBC is likely underestimated since contacts to not  
187 reconstructed HCs are not included (see above). Furthermore, the number of BCs contacted at bulbs  
188 per HC was lowest for the CBC types 5T, X, 8 and 9 and highest for CBC types 6 and 7 (Fig. 4f). For  
189 types X, 8 and 9, the low numbers likely originate in their lower cell count while for CBC5T (which  
190 has the same dendritic density as CBC5O and 5I cells) it is a consequence of the low number of  
191 contacts per CBC. Comparing the bulb-to-ON-CBC contacts with the number of cone-to-ON-CBC  
192 contacts taken from our recent study (Behrens et al. 2016) showed that both connectivity patterns are  
193 almost identical for nearly all BC types (Fig. 2e,4e). The only striking difference was found within the  
194 group of CBC5 cells: CBC5T has the lowest contact number with both HC bulbs and cones whereas  
195 CBC5I made many contacts with both cones and bulbs. CBC5O sampled from as few cones as  
196 CBC5T but made more bulb contacts, similar to CBC5I (Fig. 4g). Thus, while the morphological  
197 properties such as density, dendritic field size, axon terminal size and stratification depth of the three  
198 ‘sister’ types of CBC5 do not differ much, they can be distinguished based on their connectivity  
199 patterns with cones and HCs in the outer retina.

200

### 201 **Horizontal cell bulbs are putative synaptic structures**

202 If HC bulbs indeed formed presynaptic sites to relay global cone signals, one would expect  
203 presynaptic proteins to be co-localized with these bulbs. In mammalian HCs, several presynaptic  
204 proteins are associated with synaptic vesicles, including the vesicular gamma-aminobutyric acid  
205 transporter (VGAT) (Guo et al. 2009; Cueva et al. 2002). However, most immunolabeling studies of  
206 the OPL have focused on the distal tips of HCs rather than their primary dendrites. To identify  
207 potential presynaptic sites along HC dendrites, we therefore used calbindin and VGAT antibodies to  
208 visualize HCs and presynaptic vesicles, respectively (Fig. 5a). Indeed, we found intense VGAT  
209 staining in dendritic thickenings at the same depth at which bulbs were found in the EM data.

210 If bulbs are the site of GABAergic synapses between HCs and to BCs, then GABA receptors  
211 should be present at VGAT-positive bulbs as well. In the mouse retina, different GABA receptor  
212 subunits are expressed in the outer retina: A ‘dashed’ band of a GABA receptor  $\alpha 1$  subunit staining  
213 can be seen at the level of the cone axon terminals (Haverkamp and Wässle 2000), indicating that  $\alpha 1$   
214 subunits are prominently expressed by HC dendritic tips invaginating in the synaptic cleft (Kemmler et  
215 al. 2014). In contrast, GABA receptor  $\gamma 2$  subunits have a broader expression profile that clearly  
216 stratifies below the cone axon terminals (Haverkamp and Wässle 2000). Indeed, we found that VGAT  
217 and GABA receptor  $\gamma 2$  subunit immunolabeling co-localized on bulb-like structures (representative  
218 example shown in Fig. 5a; similar results were obtained in four out of four immunostainings from two  
219 different mice). To assess GABA receptor distribution on individual bulbs, we injected HCs in the

220 whole-mount preparation with the fluorescent dye Alexa Fluor 568 and then performed GABA  
221 receptor immunolabeling (Fig. 5b,c). The  $\gamma 2$  subunit immunoreactivity was strong at the level of the  
222 primary dendrites and all identified bulbs (n = 30 bulbs in n = 3 injected HCs) showed  
223 immunolabeling for the GABA receptor  $\gamma 2$  subunit, indicating that bulbs may provide and/or receive  
224 GABAergic input (Fig. 5c). Sources for GABAergic input may be other HCs (Liu et al. 2013) or  
225 eventually interplexiform amacrine cells (Witkovsky, Gábel, and Križaj 2008; Dedek et al. 2009).

226 For further evidence that the GABA receptors in bulbs may be synaptic structures, we  
227 performed focused ion beam scanning EM and reconstructed HCs from their dendritic tips in the  
228 invaginating cleft (Fig. 5d, left) to the depth in the OPL where bulbs are located. In this EM image  
229 stack, bulbs could be identified based on their thickened structure (Fig. 5d, supplementary image  
230 stack). These structures always contained mitochondria which are typically found in presynaptic  
231 structures (n = 7 bulbs) (Gala et al. 2017). However, compared with the glutamate-filled vesicles in the  
232 cone axon terminal, the vesicles in both invaginating tips and bulbs of HCs were barely detectable  
233 (Fig. 5d). Thus, the vesicle distribution was not further investigated (see Discussion).

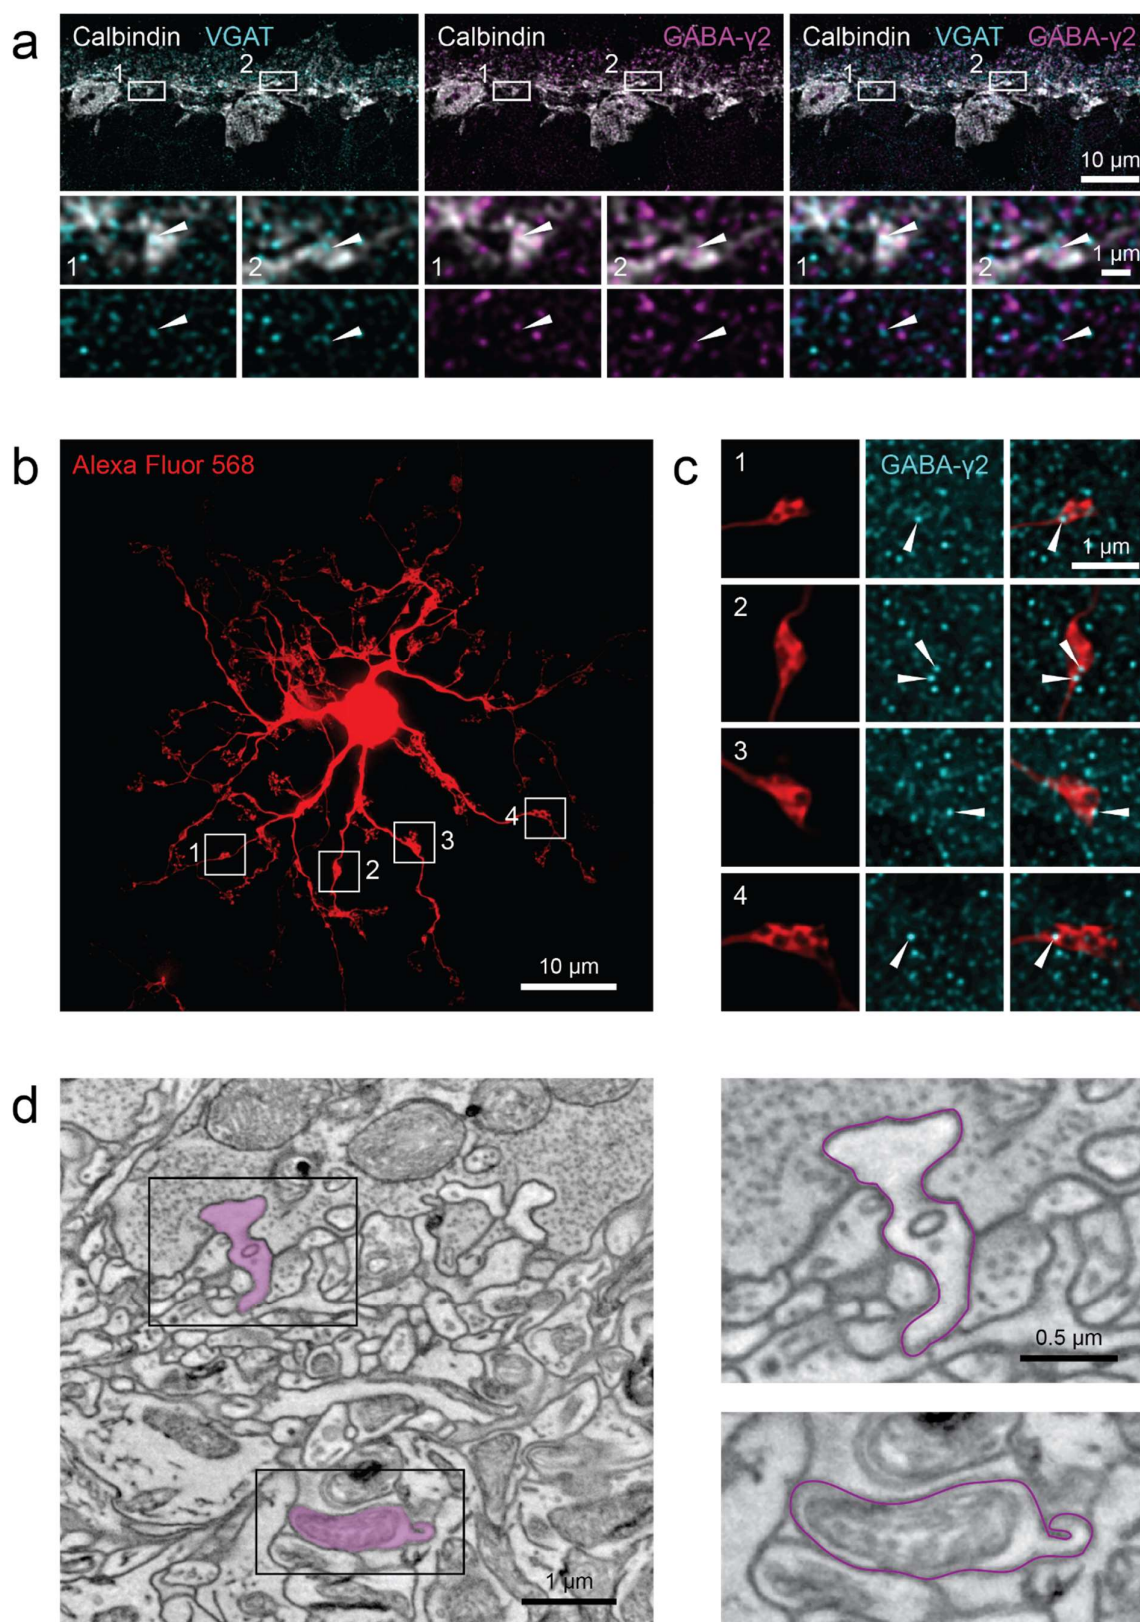



235 **Figure 5. Synaptic structures at horizontal cell bulb contacts.** (a) Calbindin labeled HCs with  
236 VGAT (cyan) and GABA receptor gamma2 (magenta) immunolabeling in vertical outer retinal  
237 section. Arrowheads indicate co-localization on primary dendrites. (b) Alexa Fluor 568-injected HC  
238 with identified bulbs (white boxes indicate examples). (c) Enlarged bulbs (red) from boxes in (b) with  
239 GABA receptor  $\gamma 2$  immunolabeling (cyan). Arrowheads indicate co-localization. (d) Electron  
240 microscopy image showing a manually traced HC (magenta) with a dendritic tip invaginating in the  
241 cone axon terminal (upper right) and the primary dendrite below the cone axon terminal with a HC  
242 bulb of the same cell (lower right). Note the mitochondrial structure in the bulb. Black rectangles:  
243 location of magnifications shown on the right.

244

245

#### 246 **Biophysical modelling indicates potential bulb function**

247 To study the potential functional role of HC bulb contacts, we built a biophysical model of a HC  
248 dendritic branch with cone input (Fig. 6a,b) based on our previously published model (Chapot et al.  
249 2017). We stimulated the cones in the model with either full-field or checkerboard noise for spatially  
250 correlated and uncorrelated input, respectively, and measured voltage signals in the HC dendritic tips  
251 invaginating into cone axon terminals ( $n = 12$ ) and in the bulb structures ( $n = 14$ ) (Fig. 6c,d). For full-  
252 field stimuli, we found high correlations between voltage signals from all recording points ( $0.85 \pm$   
253  $0.10$ ). Due to vesicle release noise included in the model, which occurred independently at each  
254 synapse between cones and HC tips, correlations between signals in different tips ( $0.73 \pm 0.07$ ) and  
255 between signals in tips and bulbs ( $0.84 \pm 0.06$ ) were lower than those between signals in bulbs ( $0.94 \pm$   
256  $0.04$ ) (Fig. 6e). However, correlations between bulbs and the average over the tip signals ( $0.97 \pm 0.02$ )  
257 were similar to the correlations between bulbs.

258 For the checkerboard noise, which is a spatially maximally uncorrelated stimulus, the result  
259 was different: The average correlation between voltage signals in tips was rather low ( $0.25 \pm 0.14$ ),  
260 confirming our previous results (Chapot et al. 2017). In contrast, the average correlation between  
261 voltage signals in bulbs was much higher ( $0.71 \pm 0.19$ ) and so was the correlation between bulb signal  
262 and the average over the tip signals ( $0.80 \pm 0.10$ ) (Fig. 6g). Together, this indicates that for a natural  
263 stimulus with spatially uncorrelated stimulation pattern, the global component of the stimulus  
264 dominates the signal at the level of the bulbs whereas the local signal at the HC dendritic tips can be  
265 used for feedback to individual cones (Fig. 7).

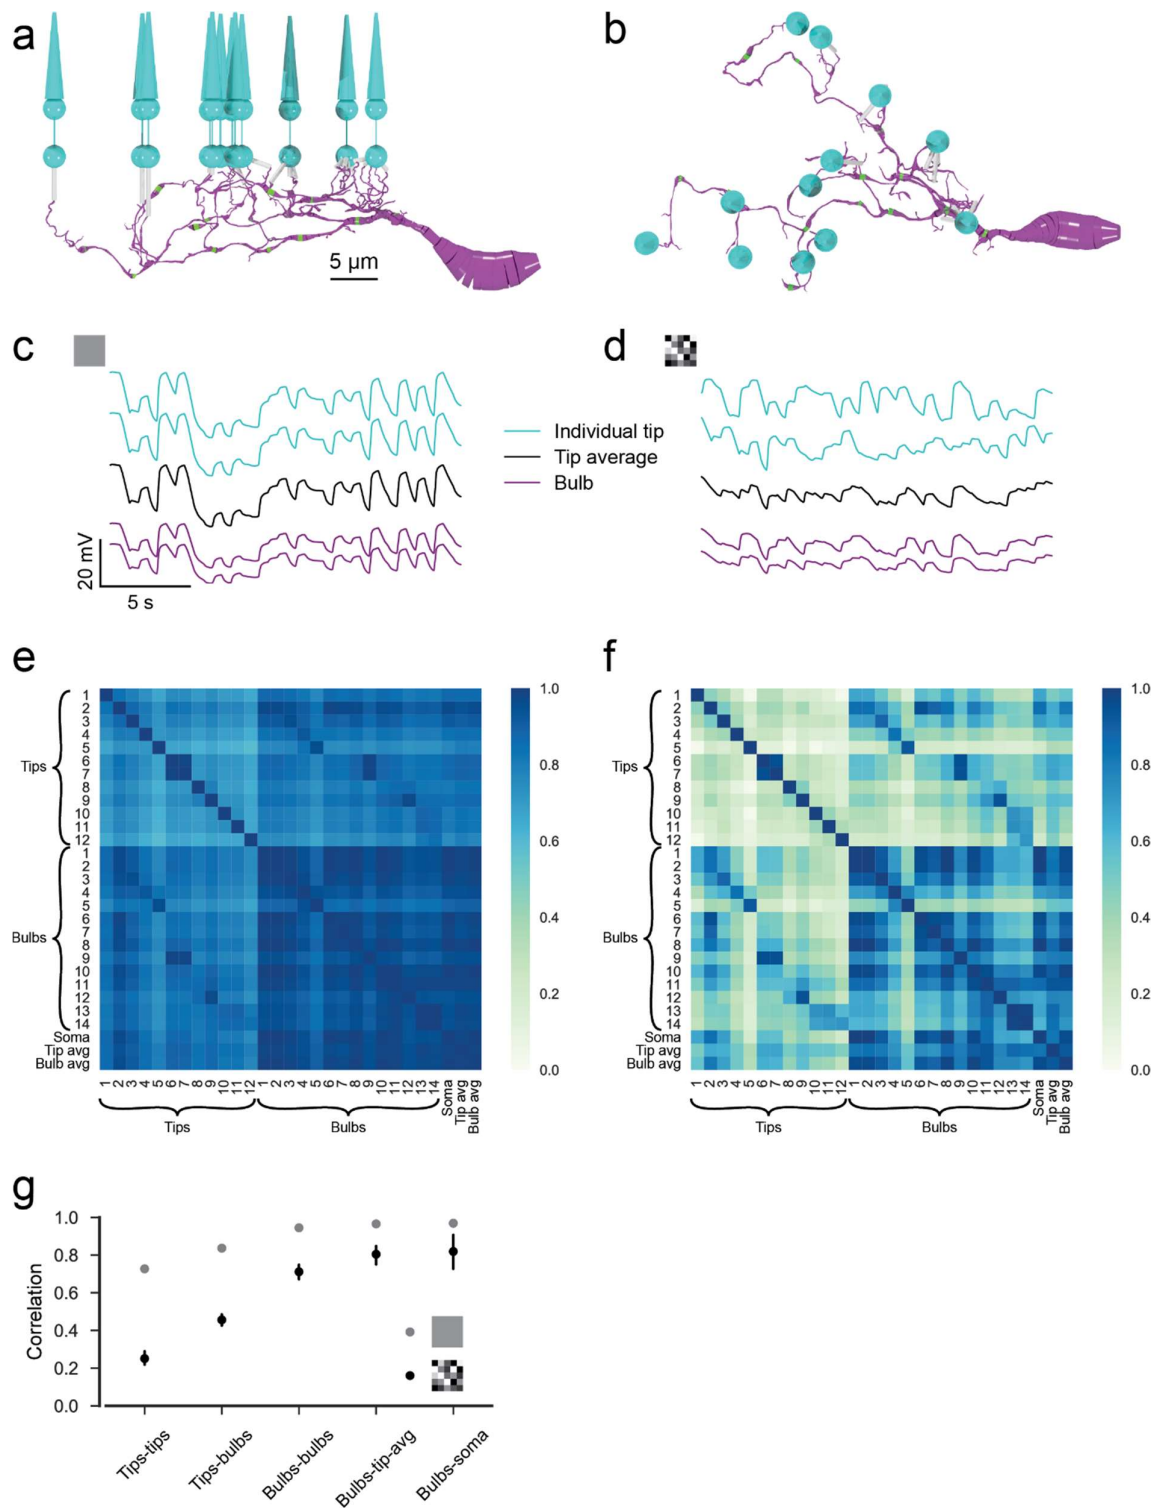

266

267 **Figure 6. Biophysical modelling.** (a) Side and (b) top view of the modelled HC dendrite with bulbs  
 268 (green) and cones (cyan). (c) & (d) Example voltage traces recorded at HC dendritic tips below cones,  
 269 at bulbs and average over all tips for (c) a random full-field noise stimulus and (d) a random  
 270 checkerboard noise stimulus without synaptic vesicle release noise. (e) & (f) Correlations from 60 s of  
 271 (e) full-field and (f) checkerboard stimulation including synaptic vesicle release noise. (g) Mean  
 272 correlations between different tips, between tips and bulbs, between different bulbs, bulbs and the tip  
 273 mean and bulbs and the soma for both stimuli. avg, average.



## 274 Discussion

275 Classically, HCs have been postulated to perform global computations like gain control and contrast  
276 normalization (Barnes, Merchant, and Mahmud 1993; Verweij, Kamermans, and Spekreijse 1996;  
277 Drinnenberg et al. 2018). However, local signaling in HCs has recently been reported in a number of  
278 studies (Jackman et al. 2011; Chapot et al. 2017; Grove et al. 2019), raising the important question,  
279 how a strongly electrically coupled syncytium of a laterally organized interneuron can perform both  
280 local and global computations and relay them to its presynaptic partners. Here, we provide a  
281 quantitative picture of connectivity in the outer retina including HCs and describe a new putative  
282 synaptic site in HCs. In contrast to the well-described feedback synapse that modulates the cone  
283 output, this putative synapse is likely a feedforward synapse that provides GABAergic drive to other  
284 HCs as well as to BCs. On the functional level, it likely relays an integrated, global signal, resulting  
285 from multiple local signals from numerous cones. This global output signal may contribute to the  
286 global center-surround organization of bipolar cells, as has long been posited (Werblin and Dowling  
287 1969; Schwartz 1974). (Fig. 7).

288  
289

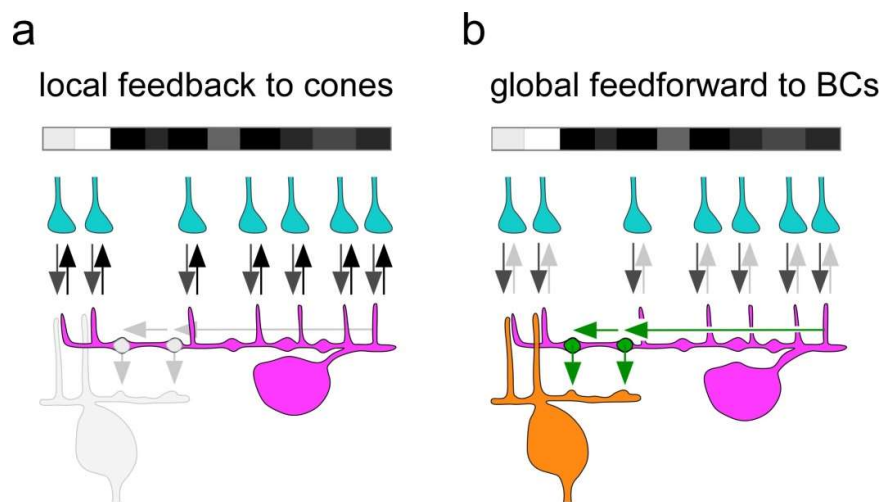

290

291 **Figure 7. Synaptic circuitry of horizontal cells in the outer mouse retina.** (a) Dendritic tips of a  
292 HC (magenta) receive cone input (grey arrows) and provide local and cone-specific feedback (black  
293 arrows) to cone axon terminals (cyan) in the presence of a spatially and temporally uncorrelated white  
294 noise stimulus (white/grey/black bar). (b) For the same uncorrelated stimulus, the cone input signals  
295 (grey arrows) are integrated to a global signal in the HC dendrite (green arrow) and forwarded by a  
296 BC-contacting bulb (green) to the BC (orange) forming the surround signal.

## 297 **Horizontal cell bulbs are likely synaptic structures**

298 Based on few ultrastructural electron microscopic examples of chemical synapses between HCs and  
299 BCs shown in earlier years (Olney 1968; Kolb 1977; Linberg and Fisher 1988), these direct synaptic  
300 connections have long been suggested (Miller and Dacheux 1976; Marchiafava 1978; Yang and Wu  
301 1991; Vardi et al. 2000; Duebel et al. 2006). However, these connections have never been  
302 systematically investigated. Here, we used the e2006 EM data set that was initially used to describe  
303 inner retinal connections (Helmstaedter et al. 2013) and photoreceptor-to-BC synapses (Behrens et al.  
304 2016). The majority (~65%) of identified HC bulbs was contacted by other HC bulbs and/or BC  
305 dendrites indicating that bulbs were not randomly distributed dendritic thickenings. This finding was  
306 supported by the uniform distribution of bulbs across the HC dendritic tree suggesting the overall  
307 mosaic organization of the mouse retina is maintained at this synaptic level. Furthermore, we found  
308 that the bulbs contained mitochondria required to supply energy for the presynaptic vesicle release  
309 mechanism as described for a reciprocal amacrine cell synapse in the cat retina (Ellias and Stevens  
310 1980). Indeed, we found synaptic proteins on HC bulbs such as VGAT and GABA  $\gamma$ 2 receptors on HC  
311 bulbs that represent pre- and postsynaptic markers, respectively. However, which retinal cell type(s)  
312 express the GABA receptors is still unclear. Since the bulbs contact other HC bulbs as well as BC  
313 dendrites, it is conceivable that the bulbs represent a general GABAergic output site to postsynaptic  
314 cells (reviewed in Diamond 2017).

315 Unfortunately, we could not detect any neurotransmitter vesicles at HC bulbs in our EM  
316 images – a problem that was reported for HCs decades ago (Dowling and Boycott 1966) and may be  
317 attributed to methodological limitations of the dataset. However, in an earlier cat retina study, vesicle  
318 clusters in HC dendrites were found to be “...typically organized around some denser particles...”  
319 (Fig. 18 in Kolb 1977). In addition, in the mouse retina, “...the synaptic complex, was of conventional  
320 configuration, involved the horizontal cell presynaptically, and was always found in the innermost  
321 aspect of the outer plexiform layer...” (Fig. 11 in Olney 1968) – this is where we found the majority of  
322 bulbs in our study. Another reason why we did not find vesicles could be the (somewhat unlikely)  
323 GABA secretion by GABA transporters as shown in the fish retina (Schwartz 1987). Additionally, we  
324 also cannot exclude the possibility that bulbs receive direct glutamatergic input by diffusion from  
325 photoreceptors – similar to OFF-CBCs – however, the distance of HC bulbs from the release sites in  
326 cones axon terminals appears to be relatively large compared with the OFF-CBC dendrites that  
327 directly contact the axon terminal. Hence, we propose that GABA release at the bulbs results from  
328 electrical signal propagation along the dendrites of the HCs rather than being initiated via diffusing  
329 glutamate.

330 A GABAergic synapse between HCs along with a depolarizing chloride level in HCs (Miller  
331 and Dacheux 1976; Kamermans and Werblin 1992) could transmit a lateral signal between them,  
332 similar to the lateral signal spread within the syncytium formed by electrical synapses. One might  
333 therefore imagine that mouse HC bulbs could represent sites of gap junctions - electrical synapses

334 between HCs (He, Weiler, and Vaney 2000). However, the vast majority of connexin57 protein  
335 forming electrical synapses in mouse HCs is expressed at more distal sites on the HC dendrites and is  
336 not very prominent on the bulb-bearing primary dendrites (Janssen-Bienhold et al. 2009). Thus, it is  
337 unlikely that the role of HC bulbs is to couple HCs by electrical synapses.

338 Our finding of an additional synapse in the outer mouse retina may explain how HCs may  
339 perform both feedback to cones and feedforward signaling to BCs simultaneously, which may  
340 contribute to understanding a longstanding enigma.

341

#### 342 **Selective connectivity with ON-CBC types as a mechanism of synaptic scaling?**

343 As previously reported, we found some ON-CBCs contact cone axon terminals in a very specific  
344 manner. For example, the CBC types 5T, 5O, X, 8 and 9 contact considerably fewer cones than  
345 expected from their relatively large dendritic field whereas other types such as types 5I, 6 and 7  
346 contact almost every cone located within their dendritic field (Behrens et al. 2016). Remarkably, this  
347 connectivity is also reflected in the number of bulbs connected by ON-CBCs: Types 5T, X and 9  
348 contact fewer bulbs than the other types while type 8 contacts only slightly more bulbs than other cells  
349 despite its significantly larger dendritic field. This correlation of excitatory and inhibitory synapse  
350 number may be a form of synaptic scaling (Turrigiano 2011) that could have an effect on the  
351 functional organization of the receptive field of BCs. The center of a receptive field is defined as the  
352 region that is driven by excitatory (i.e., direct glutamatergic) input from cones whereas the surround is  
353 formed by the lateral inhibition by interneurons in the periphery. A balanced synaptic weight between  
354 center and surround activation is likely to be crucial for the BC's ability to stay within the operational  
355 range of its output synapses.

356 The only exception is the BC type 5O; it contacts only a few cones but has relatively many  
357 bulb contacts, in strong contrast to the types 5T or 5I, which make few or many contacts to both cones  
358 and HC bulbs, respectively. Based on their morphology and their stratification depth in the inner  
359 plexiform layer, these three BC types are hardly distinguishable. However, they differ in their  
360 connectivity with cones and HC bulbs in the outer retina, and thus, may be functionally distinct  
361 regarding their receptive field properties (Franke et al. 2017). Whether the size and efficiency of  
362 synaptic contacts is different and whether or how synaptic scaling is implemented for ON-CBC and  
363 HC contacts has to be addressed in a future functional study.

364

#### 365 **Functional consequences of a second synaptic layer in the outer retina**

366 For decades, an open question has remained about how lateral inhibition essential for center-surround  
367 organization in the outer retina can be generated by fine structures such as the HC dendritic tips  
368 invaginating into the cone axon terminal (Yang and Wu 1991). With the new putative synaptic site  
369 described here between HCs and BCs, we propose a potential solution for this long existing dilemma  
370 of how HCs provide global/local feedback to cones and global feedforward signaling to BCs. In our

371 view, HCs are a retinal interneuron with two functional specializations: feedback to cones and  
372 feedforward synapses to BCs and other HCs.

373 A recent study showed that, based on their thin diameter and high resistance, the fine HC  
374 dendritic tips are optimized for generation of local cone-specific feedback and to a lesser extent for  
375 lateral propagation of electrical signals (Chapot et al. 2017). However, the extent to which the  
376 feedback to cones is global or local strongly depends on the presented visual stimulus. For small-scale  
377 non-correlated visual stimuli, the feedback is expected to be cone-specific and can differ significantly  
378 for neighboring cones, strongly following the cone output signal. For a highly correlated visual  
379 stimulus, the feedback would be similar at all dendritic tip synapses, thus generating a rather uniform,  
380 global feedback pattern generated by correlated local activity.

381 The second synapse type made by HCs, the GABAergic bulb synapse, may be optimized for  
382 the relay of global signals to other HCs and BCs that are modulated in at least three different ways:  
383 First, all the photoreceptor input that reaches the primary HC dendrites and the bulb synapses would  
384 be filtered by the feedback at the dendritic tip feedback synapses. Second, the spread along HC  
385 dendrites is subject to passive filtering. Third, depending on the coupling state of the HC network, via  
386 electrical synapses or depolarizing GABAergic synapses, signals in HC dendrites may be strengthened  
387 or weakened. In any case, the global signal would be relayed to postsynaptic cells and contribute to  
388 center-surround antagonistic receptive field organization.

389

### 390 **Interaction between global and local signaling pathways**

391 Under conditions with a rather uniform stimulation pattern, the local feedback from HCs to  
392 photoreceptors is thought to include global (lateral) signals (Warren et al. 2016) because of the high  
393 degree of correlation in the stimulus. Thus, HC feedback can accomplish both very local and spatially  
394 extended (i.e., global) feedback control of synaptic release. With the uniform stimulation pattern used  
395 in our model, the feedback to cones is correlated and is expected to be weak (Smith 1995). The reason  
396 is that the local dendritic tip signal in HCs itself is attenuated by the local feedback and hardly  
397 propagates over long distances along primary dendrites into other HC fine dendritic tips. Feedback is  
398 necessary to regulate the synaptic release of cones to maintain the optimal operating point in the  
399 output synapse, and thus to preserve the S/N ratio (Borghuis, Ratliff, and Smith 2018). However,  
400 strong feedback can become unstable for high feedback loop gains and typical synaptic delays (Smith  
401 1995). To prevent instability, the HC feedback includes an ephaptic mechanism which is fast with  
402 minimal delay (Vroman et al. 2014; Chapot et al. 2017). However, the feedback strength is also  
403 limited by the need to maintain high gain at the cone output to CBCs. In contrast, ‘simple’  
404 feedforward inhibition is always stable and can use high signaling amplitudes. These functional  
405 requirements constrain the feedback and feedforward synapses to be at structurally different synaptic  
406 sites. In addition, the synaptic mechanisms – ephaptic/pH-mediated feedback and GABAergic  
407 feedforward signaling – may contribute to the very specialized function of the two synapses: Whereas

408 the feedback synapse can decrease but also increase the cone output signal depending on the stimulus  
409 context (Smith 1995; Kemmler et al. 2014), the bulb synapse only provides GABAergic drive. Its  
410 feedforward signal to CBCs has a different role, of providing inhibition to balance the excitation in  
411 CBCs, along with a stronger spatial surround than can be provided by the cone signal. Yet, both  
412 feedback and feedforward HC signals will contribute to the surround in CBCs and all downstream  
413 neurons.

414

### 415 **The horizontal cell – an interneuron with multiple functions**

416 Interneurons show a remarkable heterogeneity and diversity in both function and morphology in all  
417 parts of the brain (reviewed in Cardin 2018). The morphology of an interneuron is thought to reflect its  
418 function: In the retina, for instance, BCs relay signals from the outer to the inner synaptic layer,  
419 whereas wide-field amacrine cells relay information laterally across the retina (reviewed in Euler et al.  
420 2014; Diamond 2017). However, morphology can be deceiving; for example, the very symmetric  
421 starburst amacrine cells in the mammalian retina compute the direction of image motion (Taylor and  
422 Smith 2012). Moreover, some interneurons have been shown to serve more than one functional role  
423 but do so in a context-dependent manner. For example, in low light conditions, AII amacrine cells are  
424 central to the primary rod vision pathway, while under photopic conditions they change their role and  
425 contribute to approach sensitivity (Münch et al. 2009). For A17 amacrine cells (Hartveit 1999) which  
426 make reciprocal synapses with rod BCs a functional switch between local and more global processing  
427 has been suggested (Schubert and Euler 2010). More intriguing is our finding that different synaptic  
428 functions such as feedforward and feedback signaling of HCs are apparently performed  
429 simultaneously at different synaptic sites as previously shown for the VG3 amacrine cell type in the  
430 mouse retina that provides excitatory and inhibitory drive at distinct synaptic sites (Lee et al. 2016;  
431 Tien, Kim, and Kerschensteiner 2016).

432 An interesting question is why local and global signaling – two different synaptic tasks – are  
433 performed in the same interneuron in the mouse outer retina. Circuits of the inner retina seem rather to  
434 be built from several types of neurons, each contributing a specific function. Maybe with few  
435 exceptions – as illustrated by A17 and VG3 amacrine cells discussed above – amacrine cells, which  
436 with ~45 types are the most diverse retinal interneuron, are thought to represent specific computational  
437 tasks. Why is this motif not implemented in the outer retina? Two possible explanations may play a  
438 role here: First, the cone axon terminal system is among the most complex synaptic structures in the  
439 brain (Haverkamp, Grünert, and Wässle 2000). Therefore, integrating a second, dedicated interneuron  
440 type during evolution may have been avoided for the sake of space limitation and circuitry  
441 simplification. This hypothesis is supported by the fact that the reciprocal feedback synapses to rod  
442 photoreceptors are not provided by an additional interneuron type but by an additional intraretinal  
443 axon terminal system of HCs which is a unique structure for interneurons in the brain. Second, the  
444 cones require a global feedback signal that represents the average background, so their synaptic vesicle

445 release can optimally represent a contrast signal (Srinivasan, Laughlin, and Dubs 1982). The most  
446 straightforward mechanism to generate such a global feedback signal is through summation of many  
447 local signals from individual cones. Although global feedback might be arranged at a separate synapse  
448 from local feedback, it is most straightforward to provide this integrated signal as local/global  
449 feedback to each cone to control its release rate.



## 450 **Methods**

### 451 **Dataset**

452 Our analysis is based on the SBEM dataset e2006 (Helmstaedter et al. 2013,  
453 <https://www.neuro.mpg.de/connectomics>). The dataset covers a piece of mouse retina of 80 x 114 x  
454 132  $\mu\text{m}$  with a resolution of 25 x 16.5 x 16.5 nm. We identified the somata of 15 HCs and  
455 skeletonized the dendrites of the five central HC in KNOSSOS (Helmstaedter, Briggman, and Denk  
456 2011, [www.knossostool.org](http://www.knossostool.org)). We used algorithms published with the dataset to reconstruct the  
457 volumes of HCs, BCs and cone axon terminals in the OPL and to identify their contacts (for details see  
458 Behrens et al. 2016).

459 We manually identified HC bulbs and their contacts. To compare the dendritic diameter  
460 profile around the bulbs with the one of random points on the dendrite (Fig. 3c), we used the Vaa3D-  
461 Neuron2 auto-tracing (Xiao and Peng 2013) to get a simplified representation of the HC morphologies  
462 from the volume reconstruction, consisting of a regularly spaced grid of nodes with associated  
463 diameters. For each bulb position we identified the closest node and extracted the dendritic diameter  
464 profile around it. For a fair comparison to average points on the dendrite, we draw a random set of  
465 nodes with distributions of average distances from soma and tips matching the bulb locations.

466 To calculate the statistics of HC-to-BC contacts at bulbs, we included only BCs where the center of  
467 the BC dendritic field was within the dendritic field of at least one of the reconstructed HC. With this  
468 method, the numbers in Fig. 4e,f are a lower bound. For the HCs, additional contacts on branches  
469 ending outside the dataset are possible as well as contacts from BCs with soma outside of the dataset,  
470 especially for larger types such as CBC8 and CBC9. The number of bulb contacts per CBC is  
471 underestimated as well since the true coverage factor of HC dendrites lies at about 5-7 while we have  
472 only five overlapping HCs in the center and coverage going down to one towards the edges of the  
473 dataset.

474

### 475 **Horizontal cell injections and immunolabeling for GABA receptors**

476 Three HCs were injected using Alexa Fluor 568 as described before (Yadav, Tetenborg, and Dedek  
477 2019). In brief, cell nuclei in the retinal whole-mount preparation were visualized with DAPI labeling.  
478 Based on depth and size of the nuclei, HCs were identified and then injected with Alexa Fluor 568  
479 using sharp electrodes and subsequently fixed using 4% paraformaldehyde. Retinal whole-mounts  
480 were then incubated in primary antibodies, and immunolabeling for the GABA receptor subunit  $\gamma 2$   
481 was carried as previously described (Ströh et al. 2013). Immunolabeling for VGAT and the GABA  
482 receptor subunit  $\gamma 2$  was carried out using fixed 12  $\mu\text{m}$  thick vertical retina sections using standard  
483 protocols with primary antibodies against VGAT, the  $\gamma 2$  subunit and calbindin and secondary  
484 antibodies. All images were taken with a Leica TCS SP8 confocal microscope. Data was deconvolved  
485 with Huygens Essential software, using a theoretical point spread function and further processed using  
486 Fiji (Schindelin et al. 2012).

### 487 **Three-Dimensional Electron Microscopy using FIB-SEM**

488 Focused ion beam-scanning electron microscopy (FIB-SEM tomography) allows efficient, complete,  
489 and automatic 3D reconstruction of HC dendrites with a resolution comparable to that of TEM (Xu et  
490 al. 2017; Bosch et al. 2015). An adult mouse (male, 14 weeks) was deeply anesthetized with isoflurane  
491 and decapitated before the eyes were dissected. All procedures were approved by the local animal care  
492 committee and were in accordance with the law for animal experiments issued by the German  
493 government (Tierschutzgesetz). The posterior eyecups were immersion fixed in a solution containing  
494 0.1 M cacodylate buffer, 4% sucrose and 2% glutaraldehyde, and then rinsed in 0.15 M cacodylate  
495 buffer. A  $1 \times 1$  mm<sup>2</sup> retina piece was stained in a solution containing 1% osmium tetroxide, 1.5%  
496 potassium ferrocyanide, and 0.15 M cacodylate buffer. The osmium stain was amplified with 1%  
497 thiocarbohydrazide and 2% osmium tetroxide. The retina was then stained with 2% aqueous uranyl  
498 acetate and lead aspartate. The tissue was dehydrated through an 70-100% ethanol series, transferred  
499 to propylene oxide, infiltrated with 50%/50% propylene oxide/Epon Hard, and then 100% Epon Hard.  
500 The Epon Hard block was hardened at 60°C.

501         Afterwards, the block was prepared for FIB-SEM tomography. The sample was trimmed using  
502 an ultramicrotome (Leica UC 7) and afterwards glued onto a special sample stub (caesar workshop)  
503 using conductive silver paint. To avoid charge artifacts, all surfaces of the block were sputter-coated  
504 with 30 nm AuPd (80/20). A focused ion dual beam (FIB) workstation (XB 1540, Carl Zeiss  
505 Microscopy, Oberkochen, Germany) was used for tomogram acquisition. This instrument uses a  
506 focused gallium ion beam that can mill the sample at an angle of 54° with respect to the electron beam.  
507 A digital 24-bit scan-generator (ATLAS5, Carl Zeiss) was used to control ion and electron beam. The  
508 sample was milled using an ion beam of 1nA at an energy of 30 kV. Images were collected at an  
509 energy of 2 kV using a pixel size of 5 x 5 nm (x,y) and a layer thickness of 15 nm (z). Milling and  
510 imaging was performed simultaneously to compensate for charging effects. The raw images were  
511 converted into an image stack, black areas were cropped, and the images were aligned using cross  
512 correlation (Mastrorade 1997). HC dendrites were manually identified in ImageJ.

513

### 514 **Modelling**

515 We built a biophysically realistic model of a HC dendritic branch using the simulation language  
516 NeuronC (Smith 1992). We used Vaa3D-Neuron2 auto-tracing (Xiao and Peng 2013) to generate a  
517 .swc file from the volume reconstruction of one HC branch and manually refined it in Neuromantic  
518 (Myatt et al. 2012). The model contains voltage-gated Ca<sup>2+</sup> and K<sup>+</sup> channels with different channel  
519 densities for proximal and distal dendrites and AMPA-type glutamate receptors at the cone synapses  
520 (Tab. 1). Photoreceptors were modelled as predefined in NeuronC with two compartments including  
521 voltage-gated Ca<sup>2+</sup> and Ca<sup>2+</sup>-activated Cl<sup>-</sup> channels. Cones were placed at the original positions with  
522 one synapse per invaginating HC dendritic tip found in the EM data. The synapses to the HC include  
523 postsynaptic AMPA channels modelled as Markov state-machines that included vesicle release noise.

524 The model was stimulated for 60 s with both full-field and checkerboard Gaussian noise with a  
525 temporal frequency of 2 Hz and equal variance. The checkerboard stimulus consisted of independent  
526 pixels of 5 x 5  $\mu\text{m}$  size such that all cones were stimulated independently. Voltage signals were  
527 recorded in a dendritic tip below each of the 12 cones and in 14 bulbs identified along the dendrite.

528

### 529 **Statistics**

530 Error bars in all plots are 95% confidence intervals (CIs) calculated as percentiles of the bootstrap  
531 distribution obtained via case resampling. In Figure 2c,d, we fitted generalized additive models (R  
532 package mgcv, Wood 2017) with Poisson output distribution for skeleton tips (Fig. 2c) and Gamma  
533 output distribution for contact area (Fig. 2d). Both had distance from soma as a smooth function and  
534 HC identity as smooth random effect.

535

536

### 537 **Acknowledgments**

538 We thank Helmstaedter et al. 2013 for making their data available and L. Peichl for critical reading of  
539 the manuscript. This work was supported by the German Research Foundation (DFG) through  
540 individual grants (SCHU2243/3-1 to TS, BE5601/2-1 to PB) and the priority program SPP2041  
541 (BE5601/4-1 to PB, EU 42/9-1 to TE), the German Ministry of Education and Research through the  
542 Bernstein Award (FKZ 01GQ1601 to PB) and NIH grants (EY023766 to TE & RGS; EY022070 to  
543 RGS).

544 **Tables**

545

|                                  |                              |                             |       |
|----------------------------------|------------------------------|-----------------------------|-------|
| Rm                               | [ $\Omega$ cm <sup>2</sup> ] |                             | 2,500 |
| Ri                               | [ $\Omega$ cm]               |                             | 200   |
| Channel densities                |                              |                             |       |
| L-type Ca <sup>2+</sup> channels | [S/cm <sup>2</sup> ]         | Soma and proximal dendrites | 3e-4  |
|                                  |                              | Distal dendrites            | 1e-3  |
| K <sup>+</sup> channels          | [S/cm <sup>2</sup> ]         | Soma and proximal dendrites | 1e-5  |
|                                  |                              | Distal dendrites            | 1e-5  |

546

547 **Table 1. Parameters of the biophysical model.**

## 548 **References**

- 549 Barnes, S., Merchant, V., & Mahmud, F. 1993. “Modulation of Transmission Gain by Protons at the  
550 Photoreceptor Output Synapse.” *Proceedings of the National Academy of Sciences* 90 (21):  
551 10081–85. <https://doi.org/10.1073/pnas.90.21.10081>.
- 552 Behrens, C., Schubert, T., Haverkamp, S., Euler, T., & Berens, P. 2016. “Connectivity Map of Bipolar  
553 Cells and Photoreceptors in the Mouse Retina.” *ELife* 5 (November): 065722.  
554 <https://doi.org/10.7554/eLife.20041>.
- 555 Borghuis, B.G., Ratliff, C.P., & Smith, R.G. 2018. “Impact of Light-Adaptive Mechanisms on  
556 Mammalian Retinal Visual Encoding at High Light Levels.” *Journal of Neurophysiology* 119  
557 (4): 1437–49. <https://doi.org/10.1152/jn.00682.2017>.
- 558 Bosch, C., Martí-nez, A., Masachs, N., Teixeira, C.M., Fernaud, I., Ulloa, F., Pérez-Martí-nez, E., et  
559 al. 2015. “FIB/SEM Technology and High-Throughput 3D Reconstruction of Dendritic Spines  
560 and Synapses in GFP-Labeled Adult-Generated Neurons.” *Frontiers in Neuroanatomy* 9 (May).  
561 <https://doi.org/10.3389/fnana.2015.00060>.
- 562 Cardin, J.A. 2018. “Inhibitory Interneurons Regulate Temporal Precision and Correlations in Cortical  
563 Circuits.” *Trends in Neurosciences* 41 (10): 689–700. <https://doi.org/10.1016/j.tins.2018.07.015>.
- 564 Chapot, C.A., Behrens, C., Rogerson, L.E., Baden, T., Pop, S., Berens, P., Euler, T., & Schubert, T.  
565 2017. “Local Signals in Mouse Horizontal Cell Dendrites.” *Current Biology* 27 (23): 3603-  
566 3615.e5. <https://doi.org/10.1016/j.cub.2017.10.050>.
- 567 Cueva, J.G., Haverkamp, S., Reimer, R.J., Edwards, R., Wässle, H., & Brecha, N.C. 2002. “Vesicular  
568  $\gamma$ -Aminobutyric Acid Transporter Expression in Amacrine and Horizontal Cells.” *Journal of*  
569 *Comparative Neurology* 445 (3): 227–37. <https://doi.org/10.1002/cne.10166>.
- 570 Dedek, K., Breuninger, T., Sevilla Müller, L.P. de, Maxeiner, S., Schultz, K., Janssen-Bienhold, U.,  
571 Willecke, K., Euler, T., & Weiler, R. 2009. “A Novel Type of Interplexiform Amacrine Cell in  
572 the Mouse Retina.” *European Journal of Neuroscience* 30 (2): 217–28.  
573 <https://doi.org/10.1111/j.1460-9568.2009.06808.x>.
- 574 Diamond, J.S. 2017. “Inhibitory Interneurons in the Retina: Types, Circuitry, and Function.” *Annual*  
575 *Review of Vision Science* 3 (1): 1–24. <https://doi.org/10.1146/annurev-vision-102016-061345>.
- 576 Dowling, J.E., & Boycott, B.B. 1966. “Organization of the Primate Retina: Electron Microscopy.”  
577 *Proceedings of the Royal Society B: Biological Sciences* 166 (1002): 80–111.  
578 <https://doi.org/10.1098/rspb.1966.0086>.

- 579 Dowling, J.E., Brown, J.E., & Major, D. 1966. "Synapses of Horizontal Cells in Rabbit and Cat  
580 Retinas." *Science* 153 (3744): 1639–41. <https://doi.org/10.1126/science.153.3744.1639>.
- 581 Drinnenberg, A., Franke, F., Morikawa, R.K., Jüttner, J., Hillier, D., Hantz, P., Hierlemann, A.,  
582 Azeredo da Silveira, R., & Roska, B. 2018. "How Diverse Retinal Functions Arise from  
583 Feedback at the First Visual Synapse." *Neuron* 99 (1): 117-134.e11.  
584 <https://doi.org/10.1016/j.neuron.2018.06.001>.
- 585 Duebel, J., Haverkamp, S., Schleich, W., Feng, G., Augustine, G.J., Kuner, T., & Euler, T. 2006.  
586 "Two-Photon Imaging Reveals Somatodendritic Chloride Gradient in Retinal ON-Type Bipolar  
587 Cells Expressing the Biosensor Clomeleon." *Neuron* 49 (1): 81–94.  
588 <https://doi.org/10.1016/j.neuron.2005.10.035>.
- 589 Ellias, S.A., & Stevens, J.K. 1980. "The Dendritic Varicosity: A Mechanism for Electrically Isolating  
590 the Dendrites of Cat Retinal Amacrine Cells?" *Brain Research* 196 (2): 365–72.  
591 [https://doi.org/10.1016/0006-8993\(80\)90401-1](https://doi.org/10.1016/0006-8993(80)90401-1).
- 592 Euler, T., Haverkamp, S., Schubert, T., & Baden, T. 2014. "Retinal Bipolar Cells: Elementary  
593 Building Blocks of Vision." *Nature Reviews Neuroscience* 15 (8): 507–19.  
594 <https://doi.org/10.1038/nrn3783>.
- 595 Franke, K., Berens, P., Schubert, T., Bethge, M., Euler, T., & Baden, T. 2017. "Inhibition Decorrelates  
596 Visual Feature Representations in the Inner Retina." *Nature* 542 (7642): 439–44.  
597 <https://doi.org/10.1038/nature21394>.
- 598 Gala, R., Lebrecht, D., Sahlender, D.A., Jorstad, A., Knott, G., Holtmaat, A., & Stepanyants, A. 2017.  
599 "Computer Assisted Detection of Axonal Bouton Structural Plasticity in in Vivo Time-Lapse  
600 Images." *ELife* 6: 1–20. <https://doi.org/10.7554/elife.29315>.
- 601 Grove, J.C.R., Hirano, A.A., los Santos, J. de, McHugh, C.F., Purohit, S., Field, G.D., Brecha, N.C., &  
602 Barnes, S. 2019. "Novel Hybrid Action of GABA Mediates Inhibitory Feedback in the  
603 Mammalian Retina." *PLOS Biology* 17 (4): e3000200.  
604 <https://doi.org/10.1371/journal.pbio.3000200>.
- 605 Guo, C., Stella, S.L., Hirano, A.A., & Brecha, N.C. 2009. "Plasmalemmal and Vesicular  $\gamma$ -  
606 Aminobutyric Acid Transporter Expression in the Developing Mouse Retina." *The Journal of*  
607 *Comparative Neurology* 512 (1): 6–26. <https://doi.org/10.1002/cne.21846>.
- 608 Hartveit, E. 1999. "Reciprocal Synaptic Interactions Between Rod Bipolar Cells and Amacrine Cells  
609 in the Rat Retina." *Journal of Neurophysiology* 81 (6): 2923–36.  
610 <https://doi.org/10.1152/jn.1999.81.6.2923>.



- 611 Haverkamp, S., Grünert, U., & Wässle, H. 2000. “The Cone Pedicle, a Complex Synapse in the  
612 Retina.” *Neuron* 27 (1): 85–95. [https://doi.org/10.1016/S0896-6273\(00\)00011-8](https://doi.org/10.1016/S0896-6273(00)00011-8).
- 613 Haverkamp, S., & Wässle, H. 2000. “Immunocytochemical Analysis of the Mouse Retina.” *The  
614 Journal of Comparative Neurology* 424 (1): 1–23. [https://doi.org/10.1002/1096-  
615 9861\(20000814\)424:1<1::AID-CNE1>3.0.CO;2-V](https://doi.org/10.1002/1096-9861(20000814)424:1<1::AID-CNE1>3.0.CO;2-V).
- 616 He, S., Weiler, R., & Vaney, D.I. 2000. “Endogenous Dopaminergic Regulation of Horizontal Cell  
617 Coupling in the Mammalian Retina.” *Journal of Comparative Neurology* 418 (1): 33–40.  
618 [https://doi.org/10.1002/\(SICI\)1096-9861\(20000228\)418:1<33::AID-CNE3>3.0.CO;2-J](https://doi.org/10.1002/(SICI)1096-9861(20000228)418:1<33::AID-CNE3>3.0.CO;2-J).
- 619 Helmstaedter, M., Briggman, K.L., & Denk, W. 2011. “High-Accuracy Neurite Reconstruction for  
620 High-Throughput Neuroanatomy.” *Nature Neuroscience* 14 (8): 1081–88.  
621 <https://doi.org/10.1038/nn.2868>.
- 622 Helmstaedter, M., Briggman, K.L., Turaga, S.C., Jain, V., Seung, H.S., & Denk, W. 2013.  
623 “Connectomic Reconstruction of the Inner Plexiform Layer in the Mouse Retina.” *Nature* 500  
624 (7461): 168–74. <https://doi.org/10.1038/nature12346>.
- 625 Jackman, S.L., Babai, N., Chambers, J.J., Thoreson, W.B., & Kramer, R.H. 2011. “A Positive  
626 Feedback Synapse from Retinal Horizontal Cells to Cone Photoreceptors.” *PLoS Biology* 9 (5).  
627 <https://doi.org/10.1371/journal.pbio.1001057>.
- 628 Janssen-Bienhold, U., Trümpner, J., Hilgen, G., Schultz, K., Sevilla Muller, L.P. De, Sonntag, S.,  
629 Dedek, K., Dirks, P., Willecke, K., & Weiler, R. 2009. “Connexin57 Is Expressed in Dendro-  
630 Dendritic and Axo-Axonal Gap Junctions of Mouse Horizontal Cells and Its Distribution Is  
631 Modulated by Light.” *Journal of Comparative Neurology* 513 (4): 363–74.  
632 <https://doi.org/10.1002/cne.21965>.
- 633 Kamermans, M., Fahrenfort, I., Schultz, K., Janssen-Bienhold, U., Sjoerdsma, T., & Weiler, R. 2001.  
634 “Hemichannel-Mediated Inhibition in the Outer Retina.” *Science* 292 (5519): 1178–80.  
635 <https://doi.org/10.1126/science.1060101>.
- 636 Kamermans, M., & Werblin, F.S. 1992. “GABA-Mediated Positive Autofeedback Loop Controls  
637 Horizontal Cell Kinetics in Tiger Salamander Retina.” *The Journal of Neuroscience* 12 (7):  
638 2451–63. <https://doi.org/10.1523/JNEUROSCI.12-07-02451.1992>.
- 639 Kemmler, R., Schultz, K., Dedek, K., Euler, T., & Schubert, T. 2014. “Differential Regulation of Cone  
640 Calcium Signals by Different Horizontal Cell Feedback Mechanisms in the Mouse Retina.”  
641 *Journal of Neuroscience* 34 (35): 11826–43. <https://doi.org/10.1523/JNEUROSCI.0272-14.2014>.
- 642 Kolb, H. 1977. “The Organization of the Outer Plexiform Layer in the Retina of the Cat: Electron

- 643 Microscopic Observations.” *Journal of Neurocytology* 6 (2): 131–53.  
644 <https://doi.org/10.1007/BF01261502>.
- 645 Lee, S., Zhang, Y., Chen, M., & Zhou, Z.J. 2016. “Segregated Glycine-Glutamate Co-Transmission  
646 from VGlut3 Amacrine Cells to Contrast-Suppressed and Contrast-Enhanced Retinal Circuits.”  
647 *Neuron* 90 (1): 27–34. <https://doi.org/10.1016/j.neuron.2016.02.023>.
- 648 Linberg, K.A., & Fisher, S.K. 1988. “Ultrastructural Evidence That Horizontal Cell Axon Terminals  
649 Are Presynaptic in the Human Retina.” *The Journal of Comparative Neurology* 268 (2): 281–97.  
650 <https://doi.org/10.1002/cne.902680211>.
- 651 Liu, X., Hirano, A.A., Sun, X., Brecha, N.C., & Barnes, S. 2013. “Calcium Channels in Rat Horizontal  
652 Cells Regulate Feedback Inhibition of Photoreceptors through an Unconventional GABA- and  
653 PH-Sensitive Mechanism.” *The Journal of Physiology* 591 (13): 3309–24.  
654 <https://doi.org/10.1113/jphysiol.2012.248179>.
- 655 Marchiafava, P.L. 1978. “Horizontal Cells Influence Membrane Potential of Bipolar Cells in the  
656 Retina of the Turtle.” *Nature* 275 (5676): 141–42. <https://doi.org/10.1038/275141a0>.
- 657 Mastronarde, D.N. 1997. “Dual-Axis Tomography: An Approach with Alignment Methods That  
658 Preserve Resolution.” *Journal of Structural Biology* 120 (3): 343–52.  
659 <https://doi.org/10.1006/jsbi.1997.3919>.
- 660 Miller, R.F., & Dacheux, R.F. 1976. “Synaptic Organization and Ionic Basis of on and off Channels in  
661 Mudpuppy Retina. I. Intracellular Analysis of Chloride-Sensitive Electrogenic Properties of  
662 Receptors, Horizontal Cells, Bipolar Cells, and Amacrine Cells.” *The Journal of General  
663 Physiology* 67 (6): 639–59. <https://doi.org/10.1085/jgp.67.6.639>.
- 664 Münch, T.A., Silveira, R.A. Da, Siebert, S., Viney, T.J., Awatramani, G.B., & Roska, B. 2009.  
665 “Approach Sensitivity in the Retina Processed by a Multifunctional Neural Circuit.” *Nature  
666 Neuroscience* 12 (10): 1308–16. <https://doi.org/10.1038/nn.2389>.
- 667 Myatt, D.R., Hadlington, T., Ascoli, G.A., & Nasuto, S.J. 2012. “Neuromantic – from Semi-Manual to  
668 Semi-Automatic Reconstruction of Neuron Morphology.” *Frontiers in Neuroinformatics* 6  
669 (March): 1–14. <https://doi.org/10.3389/fninf.2012.00004>.
- 670 Olney, J.W. 1968. “An Electron Microscopic Study of Synapse Formation, Receptor Outer Segment  
671 Development, and Other Aspects of Developing Mouse Retina.” *Investigative Ophthalmology &  
672 Visual Science* 7 (3): 250–68. <http://www.ncbi.nlm.nih.gov/pubmed/5655873>.
- 673 Schindelin, J., Arganda-Carreras, I., Frise, E., Kaynig, V., Longair, M., Pietzsch, T., Preibisch, S., et  
674 al. 2012. “Fiji: An Open-Source Platform for Biological-Image Analysis.” *Nature Methods* 9 (7):

- 675           676–82. <https://doi.org/10.1038/nmeth.2019>.
- 676 Schubert, T., & Euler, T. 2010. “Retinal Processing: Global Players Like It Local.” *Current Biology*  
677           20 (11): R486–88. <https://doi.org/10.1016/j.cub.2010.04.034>.
- 678 Schwartz, E.A. 1974. “Responses of Bipolar Cells in the Retina of the Turtle.” *The Journal of*  
679           *Physiology* 236 (1): 211–24. <https://doi.org/10.1113/jphysiol.1974.sp010431>.
- 680 ———. 1987. “Depolarization without Calcium Can Release Gamma-Aminobutyric Acid from a  
681           Retinal Neuron.” *Science* 238 (4825): 350–55. <https://doi.org/10.1126/science.2443977>.
- 682 Smith, R.G. 1992. “NeuronC: A Computational Language for Investigating Functional Architecture of  
683           Neural Circuits.” *Journal of Neuroscience Methods* 43 (2–3): 83–108.  
684           [https://doi.org/10.1016/0165-0270\(92\)90019-A](https://doi.org/10.1016/0165-0270(92)90019-A).
- 685 ———. 1995. “Simulation of an Anatomically Defined Local Circuit: The Cone-Horizontal Cell  
686           Network in Cat Retina.” *Visual Neuroscience* 12 (03): 545–61.  
687           <https://doi.org/10.1017/S0952523800008440>.
- 688 Srinivasan, M. V, Laughlin, S.B., & Dubs, A. 1982. “Predictive Coding: A Fresh View of Inhibition in  
689           the Retina.” *Proceedings of the Royal Society of London. Series B. Biological Sciences* 216  
690           (1205): 427–59. <https://doi.org/10.1098/rspb.1982.0085>.
- 691 Ströh, S., Puller, C., Swirski, S., Hölzel, M.-B., Linde, L.I.S. van der, Segelken, J., Schultz, K., et al.  
692           2018. “Eliminating Glutamatergic Input onto Horizontal Cells Changes the Dynamic Range and  
693           Receptive Field Organization of Mouse Retinal Ganglion Cells.” *The Journal of Neuroscience* 38  
694           (8): 0141–17. <https://doi.org/10.1523/JNEUROSCI.0141-17.2018>.
- 695 Ströh, S., Sonntag, S., Janssen-Bienhold, U., Schultz, K., Cimiotti, K., Weiler, R., Willecke, K., &  
696           Dedek, K. 2013. “Cell-Specific Cre Recombinase Expression Allows Selective Ablation of  
697           Glutamate Receptors from Mouse Horizontal Cells.” *PLoS ONE* 8 (12): 15–17.  
698           <https://doi.org/10.1371/journal.pone.0083076>.
- 699 Taylor, W.R., & Smith, R.G. 2012. “The Role of Starburst Amacrine Cells in Visual Signal  
700           Processing.” *Visual Neuroscience* 29 (01): 73–81. <https://doi.org/10.1017/S0952523811000393>.
- 701 Thoreson, W.B., & Mangel, S.C. 2012. “Lateral Interactions in the Outer Retina.” *Progress in Retinal*  
702           *and Eye Research* 31 (5): 407–41. <https://doi.org/10.1016/j.preteyeres.2012.04.003>.
- 703 Tien, N.W., Kim, T., & Kerschensteiner, D. 2016. “Target-Specific Glycinergic Transmission from  
704           VGLUT3-Expressing Amacrine Cells Shapes Suppressive Contrast Responses in the Retina.” *Cell*  
705           *Reports* 15 (7): 1369–75. <https://doi.org/10.1016/j.celrep.2016.04.025>.

- 706 Tsukamoto, Y., & Omi, N. 2014. “Some OFF Bipolar Cell Types Make Contact with Both Rods and  
707 Cones in Macaque and Mouse Retinas.” *Frontiers in Neuroanatomy* 8 (September): 105.  
708 <https://doi.org/10.3389/fnana.2014.00105>.
- 709 Turrigiano, G.G. 2011. “Stabilizing Neuronal Function Homeostatic Synaptic Plasticity: Local and  
710 Global Mechanisms for Homeostatic Synaptic Plasticity: Local and Global Mechanisms for  
711 Stabilizing Neuronal Function.” *Cold Spring Harb Perspect Biol*, 1–18.  
712 <https://doi.org/10.1101/cshperspect.a005736>.
- 713 Vardi, N., Zhang, L.-L., Payne, J.A., & Sterling, P. 2000. “Evidence That Different Cation Chloride  
714 Cotransporters in Retinal Neurons Allow Opposite Responses to GABA.” *The Journal of*  
715 *Neuroscience* 20 (20): 7657–63. <https://doi.org/10.1523/JNEUROSCI.20-20-07657.2000>.
- 716 Verweij, J., Kamermans, M., & Spekreijse, H. 1996. “Horizontal Cells Feed Back to Cones by  
717 Shifting the Cone Calcium-Current Activation Range.” *Vision Research* 36 (24): 3943–53.  
718 [https://doi.org/10.1016/S0042-6989\(96\)00142-3](https://doi.org/10.1016/S0042-6989(96)00142-3).
- 719 Vroman, R., Klaassen, L.J., Howlett, M.H.C., Cenedese, V., Klooster, J., Sjoerdsma, T., &  
720 Kamermans, M. 2014. “Extracellular ATP Hydrolysis Inhibits Synaptic Transmission by  
721 Increasing PH Buffering in the Synaptic Cleft.” *PLoS Biology* 12 (5).  
722 <https://doi.org/10.1371/journal.pbio.1001864>.
- 723 Warren, T.J., Hook, M.J. Van, Supuran, C.T., & Thoreson, W.B. 2016. “Sources of Protons and a Role  
724 for Bicarbonate in Inhibitory Feedback from Horizontal Cells to Cones in *Ambystoma Tigrinum*  
725 Retina.” *Journal of Physiology* 594 (22): 6661–77. <https://doi.org/10.1113/JP272533>.
- 726 Wässle, H., Puller, C., Müller, F., & Haverkamp, S. 2009. “Cone Contacts, Mosaics, and Territories of  
727 Bipolar Cells in the Mouse Retina.” *The Journal of Neuroscience : The Official Journal of the*  
728 *Society for Neuroscience* 29 (1): 106–17. <https://doi.org/10.1523/JNEUROSCI.4442-08.2009>.
- 729 Werblin, F.S., & Dowling, J.E. 1969. “Organization of the Retina of the Mudpuppy, *Necturus*  
730 *Maculosus*. II. Intracellular Recording.” *Journal of Neurophysiology* 32 (3): 339–55.  
731 <https://doi.org/10.1152/jn.1969.32.3.339>.
- 732 Witkovsky, P., Gábel, R., & Križaj, D. 2008. “Anatomical and Neurochemical Characterization of  
733 Dopaminergic Interplexiform Processes in Mouse and Rat Retinas.” *The Journal of Comparative*  
734 *Neurology* 510 (2): 158–74. <https://doi.org/10.1002/cne.21784>.
- 735 Wood, S.N. 2017. *Generalized Additive Models: An Introduction with R, Second Edition*. 2nd ed.  
736 Chapman and Hall/CRC.
- 737 Xiao, H., & Peng, H. 2013. “APP2: Automatic Tracing of 3D Neuron Morphology Based on

- 738 Hierarchical Pruning of a Gray-Weighted Image Distance-Tree.” *Bioinformatics* 29 (11): 1448–  
739 54. <https://doi.org/10.1093/bioinformatics/btt170>.
- 740 Xu, C.S., Hayworth, K.J., Lu, Z., Grob, P., Hassan, A.M., García-Cerdán, J.G., Niyogi, K.K., Nogales,  
741 E., Weinberg, R.J., & Hess, H.F. 2017. “Enhanced FIB-SEM Systems for Large-Volume 3D  
742 Imaging.” *ELife* 6: 1–36. <https://doi.org/10.7554/eLife.25916>.
- 743 Yadav, S.C., Tetenborg, S., & Dedek, K. 2019. “Corrigendum: Gap Junctions in A8 Amacrine Cells  
744 Are Made of Connexin36 but Are Differently Regulated Than Gap Junctions in All Amacrine  
745 Cells.” *Frontiers in Molecular Neuroscience* 12 (June): 1–2.  
746 <https://doi.org/10.3389/fnmol.2019.00149>.
- 747 Yang, X., & Wu, S. 1991. “Feedforward Lateral Inhibition in Retinal Bipolar Cells: Input-Output  
748 Relation of the Horizontal Cell-Depolarizing Bipolar Cell Synapse.” *Pnas* 88 (8): 3310–13.  
749 <https://doi.org/10.1073/pnas.88.8.3310>.
